# Supplementary material for: A Li–O2/CO2 battery
Source: Royal Society of Chemistry journal article supplement (doi:10.1039/c0cc05176d), 2011-01-01
Supplement: c0cc05176d.pdf [file c0cc05176d.pdf]

# Electronic Supplementary Information

## A Li-O<sub>2</sub>/CO<sub>2</sub> battery

Kensuke Takechi\*, Tohru Shiga and Takahiko Asaoka  
*Advanced Battery Lab., Toyota Central R&D Laboratories, Inc., 41-1  
Nagakute, Aichi 480-1192, Japan*

### Experimental details:

#### Cell construction and evaluation

Ketjen-black (ECP-600JD, Mitsubishi Chemical), PTFE binder (F104, Daikin Chemical), Li foil (0.4 mm, Honjou Metal), Li bis(trifluoromethanesulfonyl)imide (LiTFSI, Kishida Chemical) and mixed solvent of ethylene carbonate (EC) and diethylcarbonate (DEC) (3:7 vol, Tomiyama Chemical) were used as received. A separator film was purchased from Tonen Chemical (25  $\mu\text{m}$  of thickness, E25MMS).

Battery evaluation was carried out by charge-discharge cycling apparatus (ASKA electronics) at 25 °C, and the current density was 0.1-0.2 mA/cm<sup>2</sup>.

#### Measurements

IR spectra of the charged electrodes were measured using a FT-IR spectrometer (AVATAR 360, Nicolet). Raman spectra were measured using a Laser Raman spectrometer (NRS-3300, JEOL). The cross-section of the electrodes were characterized using Focused Ion Beam - Scanning Electron Microscopy system (FIB-SEM) (Hitachi, FB-2000A & S-4300 Type II) at an acceleration voltage of 15 kV. Gallium ion beam was used for cutting the electrode. The samples were transferred from a glove box to the SEM chamber using a closed vessel to avoid exposure to the air.

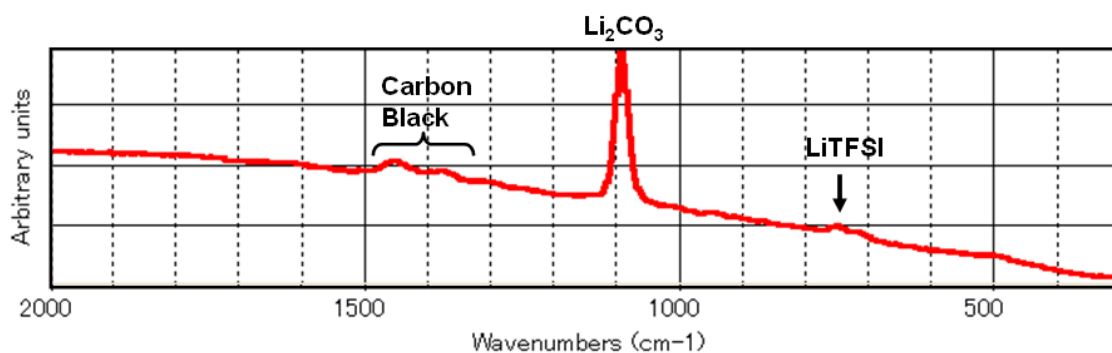

**Fig. S1.** Raman spectrum of the discharged cathode of Li-O<sub>2</sub>/CO<sub>2</sub> batteries (O<sub>2</sub>:CO<sub>2</sub> =1:1 vol.).

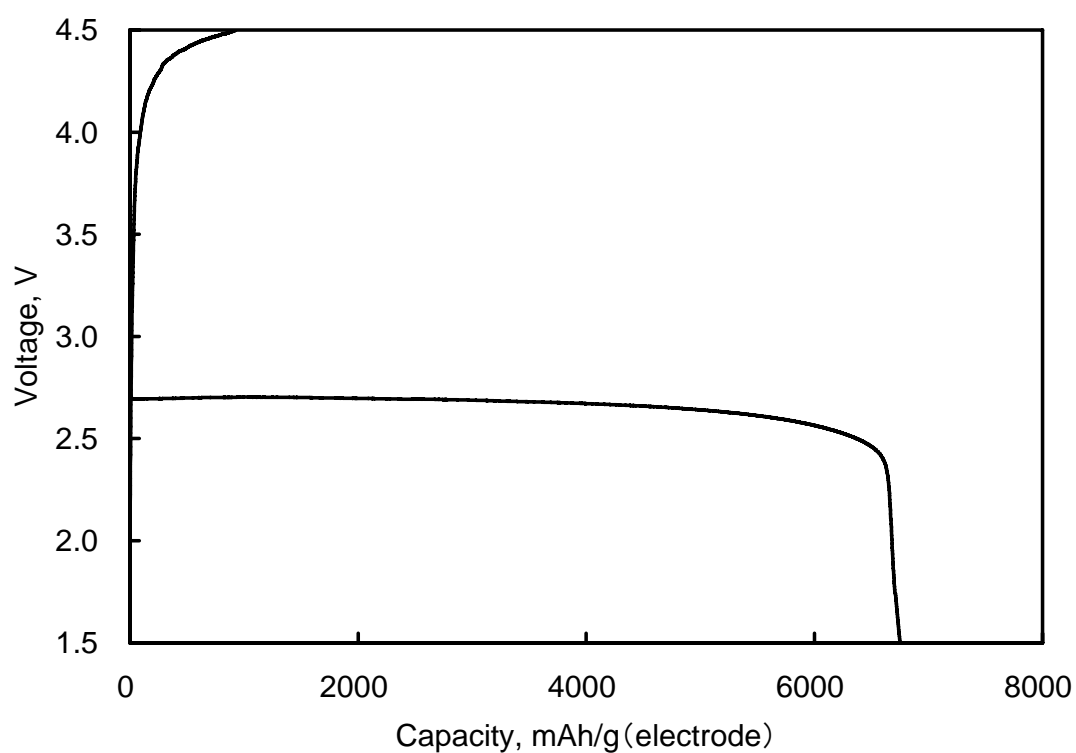

**Fig. S2.** Discharge-charge curve of Li-O<sub>2</sub>/CO<sub>2</sub> batteries (O<sub>2</sub>:CO<sub>2</sub> =1:1 vol.).

Current density(discharge/charge) = 0.1/0.05 mA/cm<sup>2</sup>.

Charge limit = 4.5V.
